# Supplementary material
Source: MDPI journal article supplement (https://www.mdpi.com/2071-1050/12/14/5737)
Supplement: s1 [file s1]

Faculty of Agricultural Sciences,  
The University of Ibadan,  
Ibadan, Oyo State.

**Impact Evaluation of the N-Power Agro Program.**

**Dear respondent,**

This questionnaire intends to elicit your esteemed response on the above subject. I assure you that all information supplied is purely for academic and research purposes and will be kept confidential. Thank you.

*Section A: Personal and Socioeconomic Information*

Please put a tick (✓) in the bracket that most appropriately represents your position.

1. Which state do you reside in? (a) Ogun ( ) (b) Oyo ( ) (c) Lagos ( )
2. Which locality do you live in? (a) rural ( ) (b) urban ( )
3. Which describes the area you spent most of your childhood? (1) City ( ) (2) Town ( ) (3) Village ( )
4. Sex: Male ( ) Female ( )
5. Age (Years): .....
6. Marital Status (a) Single ( ) (b) Married ( ) (c) Widowed ( ) (d) Divorced ( )
7. Level of Study: (a) NCE/OND/HND ( ) (b) BSc ( ) (c) MSc ( ) (d) PhD ( )
8. Your agribusiness work experience (years)? (a) 1–5 yrs (b) 6–10 yrs (c) 11–15 yrs (d) above 16 years
9. What is your undergraduate course of study? (a) Animal Science (b) Agricultural Economics/Extension (c) Crop Production/Soil science (d) Forestry (e) Fishery (f) others.....
10. Your most preferred course of study before university admission? (a) Accountancy (b) Pharmacy/Nursing (c) Geography (d) Biology (e) Economics (f) Veterinary medicine (g) Law (h) Food science (i) Biochemistry (j) Microbiology (k) Computer science (l) Mathematics (m) Physics (n) Engineering (o) Medicine (p) Agriculture
11. Level of Education of your Father: (a) Primary ( ) (b) Junior Secondary ( ) (c) Senior Secondary ( ) (d) Vocational/Technical ( ) (e) Tertiary ( ) (f) Others (..... )
12. Level of Education of your Mother: (a) Primary ( ) (b) Junior Secondary ( ) (c) Senior Secondary ( ) (d) Vocational/Technical ( ) (e) Tertiary ( ) (f) Others (..... )
13. Primary occupation of your Father: a. Farming ( ) b. Civil Service ( ) c. Trading ( ) d. Private Salary ( ) e. Artisans ( ) f. others specify.....
14. Primary occupation of your Mother: a. Farming ( ) b. Civil Service ( ) c. Trading ( ) d. Private Salary ( ) e. Artisans ( ) f. others specify.....
15. What is your monthly income? ₦ .....
16. Monthly income of your Parents.

| Household member | Monthly income (₦) |
|------------------|--------------------|
| 14a. Father      |                    |
| 14b. Mother      |                    |

17. What is the size of your household? (a) 1–3 ( ) (b) 4–6 ( ) (c) 7 and above ( )

*Section B: Factors Influencing Their Decision to Engage in Agribusiness*

18. Which locality do you prefer to live in if given the chance to choose? (a) rural ( ) (b) urban ( )

19. Have you undergone Farm Practice Year/ IT in Agriculture? (a) Yes ( ) (b) No ( )
20. If yes, how effective was it? (a)highly effective ( ) (b)Effective ( ) (c)less effective ( ) (d)ineffective ( )
21. Do you possess previous experience of farming before school? (a) Yes ( ) (b) No ( )
22. Have you personal contact with any agric experts with whom you felt very close? (a)Yes ( ) (b)No ( )
23. Do like agribusiness? (a) Yes ( ) (b) No ( )
24. Do you have a farm/agribusiness venture of yours? (a) Yes ( ) (b) No ( )
25. Aspect of agribusiness value chain you are into? (a)Production ( ) (b)Transformation ( ) (c)Services( )
26. If YES to **Question 23**, fill the following table the aspect you are participating in.

| S/N | Source of income    | Do you participate in this activity?<br>1= Yes 0=No | if yes, year started | Average income per month (#) | Number of months operated in the last 12 months | Total estimate d annual income |
|-----|---------------------|-----------------------------------------------------|----------------------|------------------------------|-------------------------------------------------|--------------------------------|
| 26a | Crops/Veges/ fruits |                                                     |                      |                              |                                                 |                                |
| 26b | Poultry & Livestock |                                                     |                      |                              |                                                 |                                |
| 26c | Processing          |                                                     |                      |                              |                                                 |                                |
| 26d | Snails/Bees         |                                                     |                      |                              |                                                 |                                |
| 26e | Fisheries           |                                                     |                      |                              |                                                 |                                |
| 26f | Consultancy         |                                                     |                      |                              |                                                 |                                |
| 26g | Marketing           |                                                     |                      |                              |                                                 |                                |
| 26h | Forestry            |                                                     |                      |                              |                                                 |                                |
| 26i | Packaging           |                                                     |                      |                              |                                                 |                                |
| 26j | Inputs Sales        |                                                     |                      |                              |                                                 |                                |
| 26k | Transport Services  |                                                     |                      |                              |                                                 |                                |
| 26l |                     |                                                     |                      |                              |                                                 |                                |
| 26  |                     |                                                     |                      |                              |                                                 |                                |

27. Reason for your engagement in agribusiness in the past? (a) Personal interest ( ) (b) Parent ( ) (c) Desire to make money ( ) (d) Relative owned the business ( )
28. Who owned the agribusiness you engaged in? (a) Self ( ) (b) Parent ( ) (c) Relation ( ) (d) Employer( )
29. Did you employ others in your agribusiness? (a) Yes ( ) (b) No ( )
30. If YES, how many people did you employ? \_\_\_\_\_
31. What is your career intention since graduation? (a) Further studies (b) Self-employment (c) Employment (d) further studies & part-time business (e) Employment & part-time studies.
32. If No to **Q24**, why? 1= lack of land ( ) 2= not enough time for such activities( ) 3= lack of technical knowhow( ) 4= not interested( ) 5= lack of credit( ) 6=lack of startup capital( ) 7=others (specify) \_\_\_\_\_
33. Do you have access to land (a) Yes ( ) (b) No ( )
34. If YES, how did you get your land? (a) Lease ( ) (b) Rent ( ) (c) Inherited ( ) (d) Purchase ( )
35. What is the size of your land (ha)? \_\_\_\_\_
36. How much did you pay to get the land? # \_\_\_\_\_
37. What is the distance of your farm to the market? (a)Very close ( ) (b)Close ( ) (c)Far ( ) (d)Very far( )
38. Are you also engaged in marketing? (a) Yes (b) No
39. Who oversees selling your products? (a) Self (b) cooperative (c) Family (d) Middlemen
40. Where do you sell it? (a) local market (b)small shops (c) online (d) Farm gate (e)Large market
41. How do you sell it? (a)fresh ( ) (b) packed ( ) (c) Processed ( )

42. Distance from production area to final selling point? (a) Very close (b) Close (c) Far (d) Very far

*Section C. Perception to Agribusiness*

43. Do you wish to venture into Agribusiness? (a) Yes ( ) (b) No ( )
44. If No, what is your dream job? (a) Banking (b) Entrepreneurship (c) Oil & Gas (d) Lecturing
45. If YES to **Q43**, what type of agribusiness enterprise do you want to venture into? (a) Crop (b) Livestock & Poultry (c) Forestry (d) Agro-processing & marketing (e) Aquaculture (f) Bees/snail
46. What type of value chain do you want to intervene in? (a) Production (b) Marketing (c) Processing (d) Transportation (e) Consultancy (f) Packaging (g) Input sales
47. Scale of entry into agribusiness? (a) Small ( ) (b) Medium ( ) (c) Large ( )
48. What is the scope of your proposed agribusiness? (a) Full time ( ) (b) Part-time ( )
49. Rank your preference of agribusiness value chain you would like to invest in.  
(1) Pry Production ( ) (2) Transformation ( ) (3) Services ( )
50. What influenced your choice of undergraduate course of study? (a) Self (b) Parent (c) Course given (d) Profit motive (e) family entrepreneurial history

**Q50**

51. What is your level of risk tolerance? (a) Risk averse ( ) (b) Risk loving ( )
52. Do you have access to credit (a) Yes ( ) (b) No ( )
53. If YES to **Q52**, how much did you borrow? #.....
54. What is your source of startup capital? (a) savings (b) Parents (c) Loans (d) Friends/relatives
55. In the **last 12 months** have you ever received credit/small loans from any formal/informal sources?  
1= Yes ( ) 2= No ( )
56. If Yes to **Q36**, kindly fill the following table to indicate the source of your credit.

| Credit provider type<br>1=Bank,<br>2=Coops,<br>3=MFIs,<br>5=others | Name of institution | Year received | Reasons for receiving? 1=to start business, 2=to buy education materials/school fee, 3=to purchase equipment/machine, 4=for agricultural input/labor, 6= for medical expense, 7=for migration abroad, 8=others_____ |
|--------------------------------------------------------------------|---------------------|---------------|---------------------------------------------------------------------------------------------------------------------------------------------------------------------------------------------------------------------|
| 56a.                                                               |                     |               |                                                                                                                                                                                                                     |
| 56b.                                                               |                     |               |                                                                                                                                                                                                                     |

57. Do you have access to savings? (a) Yes ( ) (b) No ( )
58. Do you have an account in formal/informal financial institutions (SACCOs, VSLAs, bank, microfinance institutions or other financial institutions)? 1= Yes ( ) 0= No ( )

| List the Places of saving<br>1=Bank,<br>2=SACCOs,<br>3=MFIs,<br>4=others | Name of institutions | Year opened | Reasons for saving? 1=to start business, 2=compulsory saving, 3=for school fee, 4=for future investment, 5= for health, 6=for migration (in and out of the country), 7= because my friends have account, 8=others (Specify) |
|--------------------------------------------------------------------------|----------------------|-------------|-----------------------------------------------------------------------------------------------------------------------------------------------------------------------------------------------------------------------------|
|                                                                          |                      |             |                                                                                                                                                                                                                             |
|                                                                          |                      |             |                                                                                                                                                                                                                             |
|                                                                          |                      |             |                                                                                                                                                                                                                             |

59. If No to **Q57**, what are the reasons? 1= I don't know where to save ( ) 2= saving institutions are too far away from my residence( ) 3=It is too complicated to open an account( ) 4= I don't have enough money to save ( ) 5= I don't trust them with my money ( ) 6= I don't see any advantage to having an account ( ) 7= withdrawing the money when needed is Difficult ( ) 8=low return to saving ( ) 9=Others (specify) \_\_\_\_\_
60. Do you have access to transportation (a) Yes ( ) (b) No ( )
61. If Yes to **Q60**, what kind of transportation? (a) Bicycle (b) Motorcycle (c) Car (d) Water

*Section E: Potential of N-Agro to Generate Employment*

62. Are you aware of the N-Power program? 1= Yes ( ) 2= No ( )
63. If yes, did you apply for the N-agro program? 1= Yes ( ) 2= No ( )
64. If yes, were you selected to participate in the N-agro program? 1= Yes ( ) 2= No ( )
65. What was your online test score during registration? .....
66. What benefits have you received from N-power scheme? (a) Training (b) Supervision (c) Extension (d) Stipends (e) grants (f) others \_\_\_\_\_
67. What is your perception about the N-power in reducing unemployment among the youths? (a) highly effective ( ) (b) Effective ( ) (c) less effective ( ) (d) ineffective ( )
68. Do social/media and online resources influence you into agriculture? (a) Yes ( ) (b) No ( )
69. Does lack of your dream job drive you into agribusiness? (a) Yes ( ) (b) No ( )
70. Did smart phones/ICT gadgets influence you into agribusiness? (a) Yes ( ) (b) No ( )
71. Do you have enough savings from N-Agro program to start a business? (a) Yes ( ) (b) No ( )
72. Do you have another source of income aside N-Agro income? (a) Yes ( ) (b) No ( )
73. Did you venture into agribusiness either full time or part time due to your involvement in N-Agro? (a) Yes ( ) (b) No ( )
74. How much do you make monthly before participating in N-Agro program? # \_\_\_\_\_
75. How much do you make monthly after participating in N-Agro program? # \_\_\_\_\_
76. What is your aspiration after the N-Power Program?

| S/N  | 76. ITEMS                            | Most Preferred | Somewhat preferred | Not preferred at all |
|------|--------------------------------------|----------------|--------------------|----------------------|
| 76a. | Self-employment in agribusiness      |                |                    |                      |
| 76b. | Self-employment in other enterprises |                |                    |                      |
| 76c. | Work before getting self-employment  |                |                    |                      |
| 76d. | Private/Public sector                |                |                    |                      |

*Section F: Willingness of the Respondent to Take up Agribusiness as an Occupation*

77. Level of willingness to go into agribusiness. (a) very much willing (b) Much willing (c) Moderately willing (d) Slightly willing (e) Not willing
78. Reasons for willingness to venture into agricultural entrepreneurship activities.

| S/N | Barriers                                   | Major reason | Minor Reason | Not a reason |
|-----|--------------------------------------------|--------------|--------------|--------------|
| 78a | Agribusiness has high prospects of success |              |              |              |

|      |                                                           |
|------|-----------------------------------------------------------|
| 78b  | Agribusiness befits my status as a graduate               |
| 78c  | Agricultural related enterprises are lucrative/profitable |
| 78d  | Nig. Agriculture has many untapped potentials             |
| 78e  | Easier to start/create self-employment in agribusiness    |
| 78f  | Agribusiness has brighter future                          |
| 78i  | Farming has policy support from the govt.                 |
| 78j  | Farming has extension support from govt.                  |
| 78l  | Agripreneurs are highly respected in Nigeria              |
| 78 m | Agribusiness has brighter future                          |
| 78n  | Persuasion by parents and relatives                       |
| 78°  | My parent(s) are farmers                                  |
| 78p  | Unemployment rate is very high                            |
| 78q  | Desire to be a job creator not job seekers                |
| 78r  | Training received encouraged me into practice farming     |
| 78 s | Availability of land                                      |

**79. Reasons for youths' unwillingness to venture into farming enterprises**

| S/N   | Barriers                                                     | Major reason | Minor Reason | No reason |
|-------|--------------------------------------------------------------|--------------|--------------|-----------|
| 79a   | Agriculture is not a recognized and respected profession     |              |              |           |
| 79b   | Agriculture is capital intensive and expensive to start      |              |              |           |
| 79c.  | It is tedious and risky venture                              |              |              |           |
| 79d.  | Farming is the business of rural people/illiterates          |              |              |           |
| 79e.  | Lack of access to credit facilities to agriculture graduates |              |              |           |
| 79f.  | Unfavorable Climate / Climate change                         |              |              |           |
| 79 g. | Lower income generation                                      |              |              |           |
| 79 h. | Markets for agricultural produce are not readily available   |              |              |           |
| 79i.  | Poor government interventions                                |              |              |           |
| 79j.  | Lack or high costs of inputs                                 |              |              |           |
| 79k.  | Storage facilities are not available                         |              |              |           |
| 79l   | Destruction by Animals                                       |              |              |           |
| 79 m  | Long Gestation period                                        |              |              |           |

**80. Information about the specific business and negotiation skills of the youth.**

| S/N | Indicators of negotiation skills/life skills                                                           | Degree of agreement: 1=strongly disagree, 2= disagree, 3= not decided/neutral, 4= agree, 5= Strongly agree, |
|-----|--------------------------------------------------------------------------------------------------------|-------------------------------------------------------------------------------------------------------------|
| 80a | I avoid dealing with difficult situations involving confrontation.                                     |                                                                                                             |
| 80b | I feel people take advantage of me.                                                                    |                                                                                                             |
| 80c | Talking to people in positions of authority makes me feel nervous, self-conscious or unsure of myself. |                                                                                                             |
| 80d | I behave in a self-confident manner.                                                                   |                                                                                                             |
| 80e | I express my opinions, even if others in the group disagree with me.                                   |                                                                                                             |

|      |                                                                                                         |
|------|---------------------------------------------------------------------------------------------------------|
| 80f  | I feel comfortable saying no to people.                                                                 |
| 80 g | When I go out with other people, I will do what they suggest, even if I feel like doing something else. |
| 80 h | I will use intimidation to ensure that I get my way.                                                    |
| 80i  | I have been known to lose my temper and swear at people.                                                |
| 80j  | Most people around me seem to be more assertive than I am.                                              |

81. The aspiration of the youth after the N-power Agro Program

| S/N | Personal Aspirations                               | 3 | 2 | 1 |
|-----|----------------------------------------------------|---|---|---|
| 81a | Will focus on my agribusiness career after N-power |   |   |   |
| 81b | Will further my Education after N-power            |   |   |   |
| 81c | Will Seek better employment elsewhere              |   |   |   |
| 81d | Will make agribusiness a part-time work.           |   |   |   |
